# Supplementary material
Source: publisher figshare collection journal article supplement (https://tandf.figshare.com/ndownloader/files/14132969)
Supplement: Supplementary file 1 [file 14132969]

**Supplementary online material**

Supplementary Table 1: Where known, the size of the battery (paediatric exposures) n= 204

|  | Age of child | | | | | |  |
| --- | --- | --- | --- | --- | --- | --- | --- |
| Battery size* | <1 year | 1 | 2 | 3 | 4+ years | Child, age not specified | Grand Total |
| Small |  | 27 | 28 | 14 | 5 | 6 | 80 |
| Medium | 1 | 30 | 32 | 12 | 10 | 1 | 86 |
| Large |  | 15 | 8 | 9 | 6 |  | 38 |

**Callers were asked to estimate battery size, ‘small’ being described as being like a hearing aid battery, approximately 0.5 cm in diameter, ‘medium’ being described as a battery used in a small torch, approximately 1 cm in diameter, and ‘large’ being described as the size of a 10 cent piece, approximately 2 cm in diameter.*

Supplementary Table 2: Where known, the type of battery (paediatric exposures) n= 54

| Battery type | Voltage (V) | Diameter (mm) | Count |
| --- | --- | --- | --- |
| LR44 | 1.5 | 11.6 | 21 |
| LR41 | 1.5 | 7.9 | 9 |
| CR2032 | 3 | 20 | 6 |
| LR1130 | 1.5 | 11.6 | 5 |
| Zinc air 312 | 1.4 | 7.9 | 3 |
| CR2025 | 3 | 20 | 2 |
| Zinc air 13 | 1.4 | 7.9 | 2 |
| LR (exact type unknown) | - | - | 2 |
| CR1220 | 3 | 12.5 | 1 |
| CR2016 | 3 | 20 | 1 |
| CR2325 | 3 | 23 | 1 |
| LR43 | 1.5 | 11.6 | 1 |

Supplementary Table 3: Where known, how the child accessed/potentially accessed the battery n= 99

| Situation | Age of child | | | | | | | | | |  |
| --- | --- | --- | --- | --- | --- | --- | --- | --- | --- | --- | --- |
| **<1 year** | **1** | **2** | | **3** | | **4+ years** | | **Age not specified** | | **Total,**  **n = 99** |
| Removed from the product by the child | - | 13 | | 10 | | 1 | | 6 | | 1 | 31 (31%) |
| Removed from original battery packaging by child | - | 7 | | 10 | | 2 | | 1 | | 1 | 21 (21%) |
| Loose battery accessed from a bag/drawer/container containing miscellaneous batteries | - | 11 | | 8 | | 1 | | - | | - | 20 (20%) |
| Picked up after being discarded* | - | 8 | | 5 | | 3 | | 1 | | - | 17 (17%) |
| Removed from the product by someone else | - | 4 | | 5 | | 1 | | - | | - | 10 (10%) |
| **Note – this includes in handbags, on the benchtop, etc* | | | | | | | | | | | |

Supplementary Table 4: Battery size and location on X-ray (paediatric exposures, where known, n= 84)

| Location | Small | Medium | Large | Unknown | | Grand Total |
| --- | --- | --- | --- | --- | --- | --- |
| Not found | 16 | 10 | 5 | 6 | 37 | |
| Stomach | 2 | 9 | 6 | 11 | 28 | |
| Small Intestine | 1 | 1 | 1 | 4 | 7 | |
| Large intestine |  | 2 |  | 3 | 5 | |
| Oesophagus |  | 3 | 1 |  | 4 | |
| Nose |  |  |  | 1 | 1 | |
| Possibly oesophagus, X-ray inconclusive* | 1 |  |  |  | 1 | |
| Ear |  |  |  | 1 | 1 | |

*Callers were asked to estimate battery size, ‘small’ being described as being like a hearing aid battery, approximately 0.5 cm in diameter, ‘medium’ being described as a battery used in a small torch, approximately 1 cm in diameter, and ‘large’ being described as the size of a 10 cent piece, approximately 2 cm in diameter.*

**Child was transferred to a tertiary hospital for investigation, outcome data unavailable.*
